# Supplementary material
Source: publisher figshare collection journal article supplement (https://tandf.figshare.com/articles/dataset/_/1266503)
Supplement: Supplementary file 1 [file 2]

# Supplemental file for the paper titled “Jump Detection In Blurred Regression Surfaces”

Yicheng Kang and Peihua Qiu

Department of Biostatistics, University of Florida

**Lemma A.1.** *Let  $\phi(\cdot, \cdot)$  be any continuous function,  $K(\cdot, \cdot)$  be a Lipschitz-1 continuous bivariate density kernel function with support  $\{(u, v) : u^2 + v^2 \leq 1\}$ , and  $\varepsilon_{ij}$  be i.i.d. random errors from model (2) with mean 0 and variance  $\sigma^2$ . Then, if the bandwidth  $h_n$  used in procedure (3) satisfies the condition that  $h_n = o(1)$  and  $1/(nh_n) = o(1)$ , we have*

$$\frac{1}{nh_n} \sum_{(x_i, y_j) \in O_n(x, y)} \varepsilon_{ij} \phi\left(\frac{x_i - x}{h_n}, \frac{y_j - y}{h_n}\right) K\left(\frac{x_i - x}{h_n}, \frac{y_j - y}{h_n}\right) \xrightarrow{d} N(0, \tilde{\sigma}^2), \text{ as } n \rightarrow \infty,$$

where  $\tilde{\sigma}^2 = \sigma^2 \int_{u^2+v^2 \leq 1} \phi^2(u, v) K^2(u, v) dudv$  and  $(x_i, y_j)$ ,  $O_n(x, y)$  are defined to be the same as those in (3).

**Remark** A direct conclusion of Lemma A.1 is that

$$\frac{1}{n^2 h_n^2} \sum_{(x_i, y_j) \in O_n(x, y)} \varepsilon_{ij} \phi\left(\frac{x_i - x}{h_n}, \frac{y_j - y}{h_n}\right) K\left(\frac{x_i - x}{h_n}, \frac{y_j - y}{h_n}\right) = o\left(\frac{\log(n)}{nh_n}\right) \text{ a.s.}$$

**Proof** This is a simple application of Lindeberg-Feller conditions. In fact, the terms in the summation are all independent and have the mean 0. Also, we observe that

$$\begin{aligned} & \sum_{(x_i, y_j) \in O_n(x, y)} \mathbb{E}\{\varepsilon_{ij}^2\} \phi\left(\frac{x_i - x}{h_n}, \frac{y_j - y}{h_n}\right)^2 K\left(\frac{x_i - x}{h_n}, \frac{y_j - y}{h_n}\right)^2 \frac{1}{n^2 h_n^2} \\ & \rightarrow \sigma^2 \int_{u^2+v^2 \leq 1} \phi^2(u, v) K^2(u, v) dudv, \text{ as } n \rightarrow \infty. \end{aligned}$$

Next, for any  $\delta > 0$ , we have

$$\begin{aligned} & \sum_{(x_i, y_j) \in O_n(x, y)} \phi\left(\frac{x_i - x}{h_n}, \frac{y_j - y}{h_n}\right)^2 K\left(\frac{x_i - x}{h_n}, \frac{y_j - y}{h_n}\right)^2 \frac{1}{n^2 h_n^2} \cdot \\ & \mathbb{E}\left\{\varepsilon_{ij}^2 I\left\{\frac{1}{nh_n} \left|\phi\left(\frac{x_i - x}{h_n}, \frac{y_j - y}{h_n}\right) K\left(\frac{x_i - x}{h_n}, \frac{y_j - y}{h_n}\right) \varepsilon_{ij}\right| > \delta\right\}\right\} \end{aligned}$$

$$\begin{aligned}
&\leq \frac{C}{n^2 h_n^2} \sum_{(x_i, y_j) \in O_n(x, y)} \mathbb{E} \left\{ \varepsilon_{ij}^2 I_{\{|\varepsilon_{ij}| > \frac{\delta n h_n}{C}\}} \right\} \\
&\leq \frac{C}{n^2 h_n^2} \frac{h_n^2}{1/n^2} \mathbb{E} \left\{ \varepsilon_{11}^2 I_{\{|\varepsilon_{11}| > \frac{\delta n h_n}{C}\}} \right\} \\
&\rightarrow 0, \quad \text{as } n \rightarrow \infty,
\end{aligned} \tag{A.1}$$

where  $C$  is some constant. Thus, all the Lindeberg-Feller conditions are satisfied, and the desired result follows immediately.  $\blacksquare$

**Lemma A.2.** *Under the condition of Theorem 3.1, the estimated gradient  $(\widehat{b}(x, y), \widehat{c}(x, y))$  obtained from local linear kernel smoothing procedure (3) has the following properties:*

(i) *If  $(x, y)$  is not on any jump location curve, then*

$$(\widehat{b}(x, y), \widehat{c}(x, y)) \rightarrow (f'_x(x, y), f'_y(x, y)), \quad a.s., \quad \text{as } n \rightarrow \infty. \tag{A.2}$$

(ii) *If  $(x, y)$  is a nonsingular point on a jump location curve and the jump location curve has a unique tangent line at  $(x, y)$ , then*

$$\frac{(\widehat{b}(x, y), \widehat{c}(x, y))}{\sqrt{\widehat{b}(x, y)^2 + \widehat{c}(x, y)^2}} \rightarrow (-\sin \theta, \cos \theta), \quad a.s., \quad \text{as } n \rightarrow \infty, \tag{A.3}$$

where  $\theta$  is the angle formed by the tangent line of the JLC at  $(x, y)$  and the  $x$ -axis.

(iii) *If  $(x, y)$  is a nonsingular point on a jump location curve and the jump location curve has two one-sided tangent lines at  $(x, y)$ , then*

$$\frac{(\widehat{b}(x, y), \widehat{c}(x, y))}{\sqrt{\widehat{b}(x, y)^2 + \widehat{c}(x, y)^2}} \rightarrow \left( \cos \left( \frac{\theta_1 + \theta_2}{2} \right), \sin \left( \frac{\theta_1 + \theta_2}{2} \right) \right), \quad a.s., \quad \text{as } n \rightarrow \infty, \tag{A.4}$$

where  $\theta_1$  and  $\theta_2$  are angles formed by the two one-sided tangent lines and the  $x$ -axis respectively.

**Proof** First, it is not difficult to verify that the solution of procedure (3) has the expressions

$$\widehat{b}(x, y) = \frac{1}{r_{20}} \sum_{(x_i, y_j) \in O_n(x, y)} (x_i - x) Z_{ij} K \left( \frac{x_i - x}{h_n}, \frac{y_j - y}{h_n} \right), \tag{A.5}$$

$$\widehat{c}(x, y) = \frac{1}{r_{02}} \sum_{(x_i, y_j) \in O_n(x, y)} (y_j - y) Z_{ij} K \left( \frac{x_i - x}{h_n}, \frac{y_j - y}{h_n} \right), \tag{A.6}$$

where  $r_{s_1 s_2} = \sum_{(x_i, y_j) \in O_n(x, y)} (x_i - x)^{s_1} (y_j - y)^{s_2} K \left( \frac{x_i - x}{h_n}, \frac{y_j - y}{h_n} \right)$ , for  $s_1, s_2 = 0, 1, 2$ .

To prove result (A.2), we notice that, for a given point  $(x, y)$ , if  $(x, y)$  is not on any jump location curve, then

$$\mathbb{E}(\widehat{b}(x, y)) = \frac{1}{r_{20}} \sum_{(x_i, y_j) \in O_n(x, y)} P\{f\}(x_i, y_j) (x_i - x) K \left( \frac{x_i - x}{h_n}, \frac{y_j - y}{h_n} \right), \quad (\text{A.7})$$

where

$$\begin{aligned} P\{f\}(x_i, y_j) &= \int \int_{u^2 + v^2 \leq \rho_n^2} p(u, v; x_i, y_j) f(x_i - u, y_j - v) \, dudv \\ &= \int \int_{u^2 + v^2 \leq \rho_n^2} p(u, v; x_i, y_j) [f(x_i, y_j) - f'_x(x_i, y_j)u \\ &\quad - f'_y(x_i, y_j)v + O(\rho_n^2)] \, dudv \\ &= f(x_i, y_j) + O(\rho_n^2). \end{aligned} \quad (\text{A.8})$$

In the last equation of (A.8), we have used the symmetry of  $p$ . By (A.7) and (A.8), we have

$$\begin{aligned} &\mathbb{E}(\widehat{b}(x, y)) \\ &= \frac{1}{r_{20}} \sum_{(x_i, y_j) \in O_n(x, y)} [f(x_i, y_j) + O(\rho_n^2)] (x_i - x) K \left( \frac{x_i - x}{h_n}, \frac{y_j - y}{h_n} \right) \\ &= \frac{1}{r_{20}} \sum_{(x_i, y_j) \in O_n(x, y)} \left[ f(x, y) + f'_x(x, y)(x_i - x) + f'_y(x, y)(y_j - y) + \frac{1}{2} f''_{xx}(x, y)(x_i - x)^2 + \right. \\ &\quad \left. f''_{xy}(x, y)(x_i - x)(y_j - y) + \frac{1}{2} f''_{yy}(x, y)(y_j - y)^2 + O(h_n^3) \right] (x_i - x) K \left( \frac{x_i - x}{h_n}, \frac{y_j - y}{h_n} \right) \\ &\quad + \frac{1}{r_{20}} \sum_{(x_i, y_j) \in O_n(x, y)} O(\rho_n^2) (x_i - x) K \left( \frac{x_i - x}{h_n}, \frac{y_j - y}{h_n} \right) \\ &= f'_x(x, y) + O(\rho_n^2/h_n) + O(h_n^2). \end{aligned} \quad (\text{A.9})$$

In the last equation of the above expression, we have used the results that  $r_{s_1, s_2} = 0$ , for  $s_1, s_2 = 0, 1, 2$  with  $s_1 + s_2$  being odd, using the circular symmetry of  $K$ , the equal spacing of the design points, and the properties that  $r_{20} = O(n^2 h_n^4)$ , which can be proved similarly to expression (23) in Proposition 2 of Qiu (2009). Then, by Lemma A.1, we have

$$\frac{1}{n^2 h_n^2} \sum_{(x_i, y_j) \in O_n(x, y)} \varepsilon_{ij} \phi \left( \frac{x_i - x}{h_n}, \frac{y_j - y}{h_n} \right) K \left( \frac{x_i - x}{h_n}, \frac{y_j - y}{h_n} \right) = o \left( \frac{\log n}{n h_n} \right), \quad a.s., \quad (\text{A.10})$$

where  $\phi(u, v)$  is any continuous function defined in the region  $\{(u, v) : u^2 + v^2 \leq 1\}$ . By (A.7) and the fact that  $r_{20} = O(n^2 h_n^4)$ , we have

$$\widehat{b}(x, y) - E(\widehat{b}(x, y)) = \frac{1}{r_{20}} \sum_{(x_i, y_j) \in O_n(x, y)} \varepsilon_{ij}(x_i - x) K\left(\frac{x_i - x}{h_n}, \frac{y_j - y}{h_n}\right) = o\left(\frac{\log(n)}{n h_n^2}\right), \text{ a.s.} \quad (\text{A.11})$$

Similarly,

$$\widehat{c}(x, y) - E(\widehat{c}(x, y)) = \frac{1}{r_{02}} \sum_{(x_i, y_j) \in O_n(x, y)} \varepsilon_{ij}(y_j - y) K\left(\frac{x_i - x}{h_n}, \frac{y_j - y}{h_n}\right) = o\left(\frac{\log(n)}{n h_n^2}\right), \text{ a.s.} \quad (\text{A.12})$$

(A.2) is then obtained, after combining (A.11) and (A.12).

To prove (A.3), assume that  $(x, y)$  is a nonsingular point on a jump location curve. Then,  $O_n(x, y)$  consists of the following three disjoint parts  $O_{n,l}(x, y)$ ,  $O_{n,c}(x, y)$ , and  $O_{n,r}(x, y)$ , where  $O_{n,c}(x, y)$  is a band of width  $2\rho_n$  containing the jump location curve segment, and  $O_{n,l}(x, y)$  and  $O_{n,r}(x, y)$  are two neighborhoods on its different sides. Since the jump location curve has a unique tangent line at  $(x, y)$ , difference between the curve and the tangent line will be negligible. Thus, we may assume that the jump location curve segment is a straight line in  $O_n(x, y)$  and it forms an angle, denoted by  $\theta$ , with the x-axis. Then,

$$\begin{aligned} & E(\widehat{b}(x, y)) \\ &= \frac{1}{r_{20}} \left( \sum_{O_{n,l}(x, y)} + \sum_{O_{n,c}(x, y)} + \sum_{O_{n,r}(x, y)} \right) P\{f\}(x_i, y_j)(x_i - x) K\left(\frac{x_i - x}{h_n}, \frac{y_j - y}{h_n}\right) \\ &= \frac{1}{r_{20}} \sum_{O_{n,l}(x, y)} [f(x_i, y_j) + O(\rho_n^2)](x_i - x) K\left(\frac{x_i - x}{h_n}, \frac{y_j - y}{h_n}\right) + \\ & \quad \frac{1}{r_{20}} \sum_{O_{n,c}(x, y)} P\{f\}(x_i, y_j)(x_i - x) K\left(\frac{x_i - x}{h_n}, \frac{y_j - y}{h_n}\right) + \\ & \quad \frac{1}{r_{20}} \sum_{O_{n,r}(x, y)} [f(x_i, y_j) + O(\rho_n^2)](x_i - x) K\left(\frac{x_i - x}{h_n}, \frac{y_j - y}{h_n}\right) \\ &= \frac{1}{r_{20}} \sum_{O_{n,l}(x, y)} [f_-(x, y) + O(h_n) + O(\rho_n^2)](x_i - x) K\left(\frac{x_i - x}{h_n}, \frac{y_j - y}{h_n}\right) + O\left(\frac{\rho_n}{h_n^2}\right) + \end{aligned}$$

$$\begin{aligned}
& \frac{1}{r_{20}} \sum_{O_{n,r}(x,y)} [f_+(x,y) + O(h_n) + O(\rho_n^2)](x_i - x)K\left(\frac{x_i - x}{h_n}, \frac{y_j - y}{h_n}\right) \\
&= \frac{1}{r_{20}} f_-(x,y) \sum_{i=1}^n \sum_{j=1}^n (x_i - x)K\left(\frac{x_i - x}{h_n}, \frac{y_j - y}{h_n}\right) - \\
& \quad \frac{1}{r_{20}} f_-(x,y) \sum_{O_{n,r}(x,y)} (x_i - x)K\left(\frac{x_i - x}{h_n}, \frac{y_j - y}{h_n}\right) + O\left(\frac{\rho_n^2}{h_n}\right) - \\
& \quad \frac{1}{r_{20}} f_-(x,y) \sum_{O_{n,c}(x,y)} (x_i - x)K\left(\frac{x_i - x}{h_n}, \frac{y_j - y}{h_n}\right) + \\
& \quad \frac{1}{r_{20}} f_+(x,y) \sum_{O_{n,r}(x,y)} (x_i - x)K\left(\frac{x_i - x}{h_n}, \frac{y_j - y}{h_n}\right) + O(1) + O\left(\frac{\rho_n}{h_n^2}\right) \\
&= \frac{f_+(x,y) - f_-(x,y)}{r_{20}} \sum_{O_{n,r}(x,y)} (x_i - x)K\left(\frac{x_i - x}{h_n}, \frac{y_j - y}{h_n}\right) + O(1) + O\left(\frac{\rho_n}{h_n^2}\right). \quad (\text{A.13})
\end{aligned}$$

In the second equation of (A.13), (A.8) is used. In the third equation, we have used the results that  $r_{20} = O(n^2 h_n^4)$ ,  $P\{f\}(x_i, y_j)$  are uniformly bounded when  $(x_i, y_j) \in O_{n,c}(x, y)$ , and the fact that the ratio of the area of  $O_{n,c}(x, y)$  to the area of  $O_n(x, y)$  is of order  $O(\rho_n/h_n)$ . In the fourth equation, we have used the results that  $\sum_{O_{n,r}(x,y)} (x_i - x)K\left(\frac{x_i - x}{h_n}, \frac{y_j - y}{h_n}\right) = O(n^2 h_n^3)$ ,  $\sum_{O_{n,l}(x,y)} (x_i - x)K\left(\frac{x_i - x}{h_n}, \frac{y_j - y}{h_n}\right) = O(n^2 h_n^3)$ ,  $r_{20} = O(n^2 h_n^4)$ . In the last equation, we have used the results that  $r_{10} = 0$  and  $\frac{1}{r_{20}} \sum_{O_{n,c}(x,y)} (x_i - x)K\left(\frac{x_i - x}{h_n}, \frac{y_j - y}{h_n}\right) = O\left(\frac{\rho_n}{h_n^2}\right)$ . By (A.11), we have

$$\widehat{b}(x,y) = \frac{f_+(x,y) - f_-(x,y)}{r_{20}} \sum_{O_{n,r}(x,y)} (x_i - x)K\left(\frac{x_i - x}{h_n}, \frac{y_j - y}{h_n}\right) + O(1) + O\left(\frac{\rho_n}{h_n^2}\right) + o\left(\frac{\log(n)}{nh_n^2}\right), \quad a.s. \quad (\text{A.14})$$

Similarly, we can check that

$$\widehat{c}(x,y) = \frac{f_+(x,y) - f_-(x,y)}{r_{02}} \sum_{O_{n,r}(x,y)} (y_j - y)K\left(\frac{x_i - x}{h_n}, \frac{y_j - y}{h_n}\right) + O(1) + O\left(\frac{\rho_n}{h_n^2}\right) + o\left(\frac{\log(n)}{nh_n^2}\right), \quad a.s. \quad (\text{A.15})$$

Notice the following two facts:

$$\frac{h_n}{r_{20}} \sum_{O_{n,r}(x,y)} (x_i - x)K\left(\frac{x_i - x}{h_n}, \frac{y_j - y}{h_n}\right) \rightarrow \frac{\int_{\theta}^{\theta+\pi} d\varphi \int_0^1 r^2 \cos \varphi K(r) dr}{\int_0^{2\pi} d\varphi \int_0^1 r^3 \cos^2 \varphi K(r) dr} = \frac{-2 \int_0^1 r^2 K(r) dr}{\pi \int_0^1 r^3 K(r) dr} \sin \theta. \quad (\text{A.16})$$

$$\frac{h_n}{r_{02}} \sum_{O_{n,r}(x,y)} (y_j - y)K\left(\frac{x_i - x}{h_n}, \frac{y_j - y}{h_n}\right) \rightarrow \frac{\int_{\theta}^{\theta+\pi} d\varphi \int_0^1 r^2 \sin \varphi K(r) dr}{\int_0^{2\pi} d\varphi \int_0^1 r^3 \sin^2 \varphi K(r) dr} = \frac{2 \int_0^1 r^2 K(r) dr}{\pi \int_0^1 r^3 K(r) dr} \cos \theta. \quad (\text{A.17})$$

Therefore,

$$\begin{aligned} \frac{(\widehat{b}(x, y), \widehat{c}(x, y))}{\sqrt{\widehat{b}(x, y)^2 + \widehat{c}(x, y)^2}} &= \frac{(h_n \widehat{b}(x, y), h_n \widehat{c}(x, y))}{\sqrt{h_n^2 \widehat{b}(x, y)^2 + h_n^2 \widehat{c}(x, y)^2}} \\ &\rightarrow (-\sin \theta, \cos \theta), \text{ a.s.}, \end{aligned}$$

which completes the proof of (A.3).

Next, assume that  $(x, y)$  is a nonsingular point on a jump location curve, and there exist two one-sided tangent lines of the jump location curve at  $(x, y)$ , forming angles  $\theta_1$  and  $\theta_2$ , respectively, with the x-axis. See Figure A.1 for a demonstration. The difference between

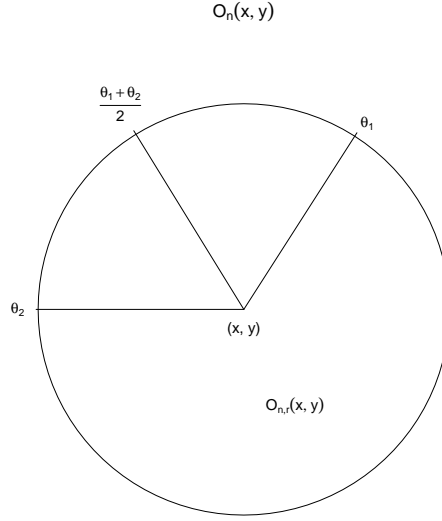

Figure A.1: A demonstration for the case when  $(x, y)$  is on a jump location curve that has two one-sided tangent lines at  $(x, y)$ .

the polygonal line and the jump location curve in  $O_n(x, y)$  is negligible when  $n$  is sufficiently large. Hence, we may assume that the jump location curve is the same as the polygonal line in  $O_n(x, y)$  without loss of generality. By the same arguments in (A.13) and (A.14), we can show that

$$\begin{aligned} \widehat{b}(x, y) &= \frac{f_+(x, y) - f_-(x, y)}{r_{20}} \sum_{O_{n,r}(x,y)} (x_i - x) K \left( \frac{x_i - x}{h_n}, \frac{y_j - y}{h_n} \right) + \\ &O(1) + O \left( \frac{\rho_n}{h_n^2} \right) + o \left( \frac{\log(n)}{nh_n^2} \right), \text{ a.s.} \end{aligned} \tag{A.18}$$

$$\begin{aligned}
\widehat{c}(x, y) &= \frac{f_+(x, y) - f_-(x, y)}{r_{02}} \sum_{O_{n,r}(x,y)} (y_j - y) K \left( \frac{x_i - x}{h_n}, \frac{y_j - y}{h_n} \right) + \\
&O(1) + O \left( \frac{\rho_n}{h_n^2} \right) + o \left( \frac{\log(n)}{nh_n^2} \right), \text{ a.s.}
\end{aligned} \tag{A.19}$$

Also, we observe the following facts:

$$\begin{aligned}
&\frac{h_n}{r_{20}} \sum_{O_{n,r}(x,y)} (x_i - x) K \left( \frac{x_i - x}{h_n}, \frac{y_j - y}{h_n} \right) \\
\rightarrow &\frac{\int_{\theta_2}^{\theta_1+2\pi} d\varphi \int_0^1 r^2 \cos \varphi K(r) dr}{\int_0^{2\pi} d\varphi \int_0^1 r^3 \cos^2 \varphi K(r) dr} = \frac{\int_0^1 r^2 K(r) dr}{\pi \int_0^1 r^3 K(r) dr} (\sin \theta_1 - \sin \theta_2) \\
= &\frac{2 \int_0^1 r^2 K(r) dr}{\pi \int_0^1 r^3 K(r) dr} \sin \left( \frac{\theta_1 - \theta_2}{2} \right) \cos \left( \frac{\theta_1 + \theta_2}{2} \right).
\end{aligned} \tag{A.20}$$

$$\begin{aligned}
&\frac{h_n}{r_{02}} \sum_{O_{n,r}(x,y)} (y_j - y) K \left( \frac{x_i - x}{h_n}, \frac{y_j - y}{h_n} \right) \\
\rightarrow &\frac{\int_{\theta_2}^{\theta_1+2\pi} d\varphi \int_0^1 r^2 \sin \varphi K(r) dr}{\int_0^{2\pi} d\varphi \int_0^1 r^3 \sin^2 \varphi K(r) dr} = \frac{\int_0^1 r^2 K(r) dr}{\pi \int_0^1 r^3 K(r) dr} (\cos \theta_2 - \cos \theta_1) \\
= &\frac{2 \int_0^1 r^2 K(r) dr}{\pi \int_0^1 r^3 K(r) dr} \sin \left( \frac{\theta_1 - \theta_2}{2} \right) \sin \left( \frac{\theta_1 + \theta_2}{2} \right).
\end{aligned} \tag{A.21}$$

Therefore, it follows after combining (A.18)–(A.21) that

$$\begin{aligned}
\frac{(\widehat{b}(x, y), \widehat{c}(x, y))}{\sqrt{\widehat{b}(x, y)^2 + \widehat{c}(x, y)^2}} &= \frac{(h_n \widehat{b}(x, y), h_n \widehat{c}(x, y))}{\sqrt{h_n^2 \widehat{b}(x, y)^2 + h_n^2 \widehat{c}(x, y)^2}} \\
&\rightarrow \left( \cos \left( \frac{\theta_1 + \theta_2}{2} \right), \sin \left( \frac{\theta_1 + \theta_2}{2} \right) \right), \text{ a.s.},
\end{aligned}$$

which finishes the proof of (A.4).  $\blacksquare$

## Proof of Theorem 3.1

Let us first prove the theorem for the jump detector LL2K. Let  $\widehat{S}_n$  be the set of detected jump points by the jump detector LL2K. For any  $(x, y) \in \Omega_{h_n}$ , we have

$$\widehat{f}_{LL2K,+}(x, y) = \frac{\sum_{(x_i, y_j) \in U_n(x, y)} \widetilde{w}_{ij}(x, y) Z_{ij}}{\sum_{(x_i, y_j) \in U_n(x, y)} \widetilde{w}_{ij}(x, y)}$$

$$\begin{aligned}
&= \frac{\sum_{U_n} H\{f\}(x_i, y_j) \tilde{w}_{ij}(x, y)}{\sum_{U_n} \tilde{w}_{ij}(x, y)} + \frac{\sum_{U_n} \varepsilon_{ij} \tilde{w}_{ij}(x, y)}{\sum_{U_n} \tilde{w}_{ij}(x, y)} \\
&=: I_1(x, y) + I_2(x, y),
\end{aligned} \tag{A.22}$$

where  $\sum_{U_n}$  denotes  $\sum_{(x_i, y_j) \in U_n}$ ,  $U_n$  is the upper half of  $O_n(x, y)$  divided by a line perpendicular to the estimated gradient direction

$$\widehat{G}(x, y) = \left( \frac{\widehat{c}(x, y)}{\sqrt{\widehat{b}(x, y)^2 + \widehat{c}(x, y)^2}}, \frac{-\widehat{b}(x, y)}{\sqrt{\widehat{b}(x, y)^2 + \widehat{c}(x, y)^2}} \right).$$

Let  $S_{h_n} = \{(x, y) \in \Omega : d_E((x, y), S) \leq h_n\}$ . Then, for any  $(x, y) \in \Omega_{h_n} \setminus S_{h_n}$ ,  $O_n(x, y)$  does not contain any jump point. Let  $\widetilde{U}_n(x, y)$  be the half of the  $O_n(x, y)$  separated by a line passing  $(x, y)$  in the direction perpendicular to the asymptotic direction of  $(\widehat{b}(x, y), \widehat{c}(x, y))$ , which is discussed in Lemma A.2, and  $\widetilde{d}_{ij}$  be the Euclidean distance from  $(x_i, y_j)$  to the asymptotic dividing line (thus,  $\widetilde{d}_{ij}$  is non-random). For a function  $\phi$  satisfying the condition that  $\sup_{u^2+v^2 \leq 1} |\phi(u, v)| \leq b_\phi < \infty$ , we have

$$\begin{aligned}
&\left| \sum_{U_n(x, y)} \phi\left(\frac{x_i - x}{h_n}, \frac{y_j - y}{h_n}\right) K\left(\frac{x_i - x}{h_n}, \frac{y_j - y}{h_n}\right) L(d_{ij}/h_n) \frac{1}{n^2 h_n^2} - \right. \\
&\quad \left. \sum_{\widetilde{U}_n(x, y)} \phi\left(\frac{x_i - x}{h_n}, \frac{y_j - y}{h_n}\right) K\left(\frac{x_i - x}{h_n}, \frac{y_j - y}{h_n}\right) L(\widetilde{d}_{ij}/h_n) \frac{1}{n^2 h_n^2} \right| \\
&\leq \frac{1}{n^2 h_n^2} \left| \sum_{U_n(x, y)} \phi\left(\frac{x_i - x}{h_n}, \frac{y_j - y}{h_n}\right) K\left(\frac{x_i - x}{h_n}, \frac{y_j - y}{h_n}\right) L(\widetilde{d}_{ij}/h_n) - \right. \\
&\quad \left. \sum_{\widetilde{U}_n(x, y)} \phi\left(\frac{x_i - x}{h_n}, \frac{y_j - y}{h_n}\right) K\left(\frac{x_i - x}{h_n}, \frac{y_j - y}{h_n}\right) L(\widetilde{d}_{ij}/h_n) \right| + O\left(\frac{|d_{ij} - \widetilde{d}_{ij}|}{h_n}\right) \\
&\leq b_\phi \|K\|_\infty \|L\|_\infty \left| \frac{1}{n^2 h_n^2} \sum_{U_n(x, y) \Delta \widetilde{U}_n(x, y)} 1 \right| + O\left(\frac{|d_{ij} - \widetilde{d}_{ij}|}{h_n}\right) \\
&= O(\theta_n) = o(1), \text{ a.s.},
\end{aligned} \tag{A.23}$$

where  $\theta_n$  denotes the acute angle between  $(\widehat{b}(x, y), \widehat{c}(x, y))$  and its asymptotic direction and  $U'_n(x, y) \Delta \widetilde{U}'_n(x, y) = (U'_n(x, y) \setminus \widetilde{U}'_n(x, y)) \cup (\widetilde{U}'_n(x, y) \setminus U'_n(x, y))$ . In the first inequality of



(A.23), we have used the Lipschitz-1 continuity of  $L$ . In the last equation, Lemma A.2 has been applied. Now, let

$$\begin{aligned}
\tilde{b}_{i,j}(x, y) &= [\tilde{B}_1(x, y) + \tilde{B}_2(x, y)(x_i - x) + \tilde{B}_3(x, y)(y_j - y)]K\left(\frac{x_i - x}{h_n}, \frac{y_j - y}{h_n}\right)L(\tilde{d}_{ij}/h_n), \\
\tilde{B}_1(x, y) &= \tilde{t}_{20}(x, y)\tilde{t}_{02}(x, y) - \tilde{t}_{11}(x, y)\tilde{t}_{11}(x, y), \\
\tilde{B}_2(x, y) &= \tilde{t}_{01}(x, y)\tilde{t}_{11}(x, y) - \tilde{t}_{10}(x, y)\tilde{t}_{02}(x, y), \\
\tilde{B}_3(x, y) &= \tilde{t}_{10}(x, y)\tilde{t}_{11}(x, y) - \tilde{t}_{01}(x, y)\tilde{t}_{20}(x, y), \\
\tilde{t}_{s_1, s_2}(x, y) &= \sum_{\tilde{U}_n(x, y)} (x_i - x)^{s_1}(y_j - y)^{s_2}K\left(\frac{x_i - x}{h_n}, \frac{y_j - y}{h_n}\right)L(\tilde{d}_{ij}/h_n).
\end{aligned}$$

Then, by using similar arguments to those in (A.23), we can check that

$$I_1(x, y) = \frac{\sum_{\tilde{U}_n(x, y)} \tilde{b}_{ij}(x, y)P\{f\}(x_i, y_j)}{\sum_{\tilde{U}_n(x, y)} \tilde{b}_{ij}(x, y)} + O(\theta_n), \text{ a.s.} \quad (\text{A.24})$$

By using (A.23), we have

$$\begin{aligned}
I_2(x, y) &= \sum_{U_n(x, y)} \frac{\tilde{w}_{ij}(x, y)\frac{1}{n^4 h_n^8}}{\frac{1}{n^6 h_n^{10}} \sum_{U_n(x, y)} \tilde{w}_{ij}(x, y)} \frac{1}{n^2 h_n^2} \varepsilon_{ij} \\
&= \sum_{U_n(x, y)} \frac{\frac{1}{n^4 h_n^8} \tilde{b}_{ij}(x, y) + O(\theta_n)}{\frac{1}{n^6 h_n^{10}} \sum_{\tilde{U}_n(x, y)} \tilde{b}_{ij}(x, y) + O(\theta_n)} \frac{1}{n^2 h_n^2} \varepsilon_{ij} \\
&= \sum_{U_n(x, y)} \left( \frac{\frac{1}{n^4 h_n^8} \tilde{b}_{ij}(x, y)}{\frac{1}{n^6 h_n^{10}} \sum_{\tilde{U}_n(x, y)} \tilde{b}_{ij}(x, y)} + O(\theta_n) \right) \frac{1}{n^2 h_n^2} \varepsilon_{ij} \\
&= \sum_{U_n(x, y)} \frac{\tilde{b}_{ij}(x, y)}{\sum_{\tilde{U}_n(x, y)} \tilde{b}_{ij}(x, y)} \varepsilon_{ij} + \frac{1}{n^2 h_n^2} \sum_{U_n(x, y)} O(\theta_n) \varepsilon_{ij} \\
&= \sum_{U_n(x, y)} \frac{\tilde{b}_{ij}(x, y)}{\sum_{\tilde{U}_n(x, y)} \tilde{b}_{ij}(x, y)} \varepsilon_{ij} + O(\theta_n), \text{ a.s.} \quad (\text{A.25})
\end{aligned}$$

In the second equation of (A.25), we have used the results that  $\tilde{B}_1(x, y) = O(n^4 h_n^8)$ ,  $\tilde{B}_2(x, y) = O(n^3 h_n^7)$ ,  $\tilde{B}_3(x, y) = O(n^3 h_n^7)$  and  $\tilde{t}_{s_1, s_2}(x, y) = O(n^2 h_n^{s_1 + s_2 + 2})$  for  $s_1, s_2 = 0, 1$ . Similar arguments to those in Lemma A.1 can be applied to  $\sum_{U_n(x, y)} \frac{\tilde{b}_{ij}(x, y)}{\sum_{\tilde{U}_n(x, y)} \tilde{b}_{ij}(x, y)} \varepsilon_{ij}$ , since  $\tilde{b}_{ij}(x, y)$  is deterministic. Consequently, we have

$$\sum_{U_n(x, y)} \frac{\tilde{b}_{ij}(x, y)}{\sum_{\tilde{U}_n(x, y)} \tilde{b}_{ij}(x, y)} \varepsilon_{ij} \stackrel{\text{asy.}}{\sim} N\left(0, \sum_{U_n(x, y)} \frac{\tilde{b}_{ij}^2(x, y)}{\left[\sum_{\tilde{U}_n(x, y)} \tilde{b}_{ij}(x, y)\right]^2}\right). \quad (\text{A.26})$$

By (A.8), we have that

$$\begin{aligned}
& \frac{\sum_{\tilde{U}_n(x,y)} \tilde{b}_{ij}(x,y) P\{f\}(x_i, y_j)}{\sum_{\tilde{U}_n(x,y)} \tilde{b}_{ij}(x,y)} \\
&= \frac{\sum_{\tilde{U}_n(x,y)} \tilde{b}_{ij}(x,y) (f(x_i, y_j) + O(\rho_n^2))}{\sum_{\tilde{U}_n(x,y)} \tilde{b}_{ij}(x,y)} \\
&= \frac{\tilde{B}_1(x,y)}{|\tilde{\Delta}|} \sum_{\tilde{U}_n(x,y)} (f(x,y) + f'_x(x,y)(x_i - x) + f'_y(x,y)(y_j - y) + O(h_n^2) + \\
&\quad O(\rho_n^2)) K\left(\frac{x_i - x}{h_n}, \frac{y_j - y}{h_n}\right) L(\tilde{d}_{ij}/h_n) + \\
&\quad \frac{\tilde{B}_2(x,y)}{|\tilde{\Delta}|} \sum_{\tilde{U}_n(x,y)} (f(x,y) + f'_x(x,y)(x_i - x) + f'_y(x,y)(y_j - y) + O(h_n^2) + \\
&\quad O(\rho_n^2))(x_i - x) K\left(\frac{x_i - x}{h_n}, \frac{y_j - y}{h_n}\right) L(\tilde{d}_{ij}/h_n) + \\
&\quad \frac{\tilde{B}_3(x,y)}{|\tilde{\Delta}|} \sum_{\tilde{U}_n(x,y)} (f(x,y) + f'_x(x,y)(x_i - x) + f'_y(x,y)(y_j - y) + O(h_n^2) + \\
&\quad O(\rho_n^2))(y_j - y) K\left(\frac{x_i - x}{h_n}, \frac{y_j - y}{h_n}\right) L(\tilde{d}_{ij}/h_n) \\
&= f(x,y) + \frac{f'_x(x,y)}{|\tilde{\Delta}|} (\tilde{B}_1(x,y)\tilde{t}_{10}(x,y) + \tilde{B}_2(x,y)\tilde{t}_{20}(x,y) + \tilde{B}_3(x,y)\tilde{t}_{11}(x,y)) + \\
&\quad \frac{f'_y(x,y)}{|\tilde{\Delta}|} (\tilde{B}_1(x,y)\tilde{t}_{01}(x,y) + \tilde{B}_2(x,y)\tilde{t}_{11}(x,y) + \tilde{B}_3(x,y)\tilde{t}_{02}(x,y)) + O(h_n^2) + O(\rho_n^2) \\
&= f(x,y) + O(h_n^2) + O(\rho_n^2), \tag{A.27}
\end{aligned}$$

where  $|\tilde{\Delta}| = \tilde{t}_{00}(x,y)\tilde{t}_{20}(x,y)\tilde{t}_{02}(x,y) + \tilde{t}_{10}(x,y)\tilde{t}_{01}(x,y)\tilde{t}_{11}(x,y) + \tilde{t}_{10}(x,y)\tilde{t}_{01}(x,y)\tilde{t}_{11}(x,y) - \tilde{t}_{01}(x,y)^2\tilde{t}_{20}(x,y) - \tilde{t}_{11}(x,y)^2\tilde{t}_{00}(x,y) - \tilde{t}_{10}(x,y)^2\tilde{t}_{02}(x,y)$ . In the second equation of (A.27), we have used (A.8). In the last equation, we have used the results that  $|\tilde{\Delta}| = \tilde{B}_1(x,y)\tilde{t}_{00}(x,y) + \tilde{B}_2(x,y)\tilde{t}_{10}(x,y) + \tilde{B}_3(x,y)\tilde{t}_{01}(x,y)$ ,  $\tilde{t}_{11}(x,y) = 0$  by the symmetry of  $K$  and  $L$ ,  $\tilde{B}_1(x,y)\tilde{t}_{10}(x,y) + \tilde{B}_2(x,y)\tilde{t}_{20}(x,y) + \tilde{B}_3(x,y)\tilde{t}_{11}(x,y) = 0$ ,  $\tilde{B}_1(x,y)\tilde{t}_{01}(x,y) + \tilde{B}_2(x,y)\tilde{t}_{11}(x,y) + \tilde{B}_3(x,y)\tilde{t}_{02}(x,y) = 0$ , and that  $\tilde{B}_1(x,y) = O(n^4 h_n^8)$ ,  $\tilde{B}_2(x,y) = O(n^4 h_n^7)$ ,  $\tilde{B}_3(x,y) = O(n^4 h_n^7)$ ,  $|\tilde{\Delta}| = O(n^6 h_n^{10})$ ,  $\tilde{t}_{s_1, s_2}(x,y) = O(n^2 h_n^{s_1 + s_2 + 2})$ , for  $s_1, s_2 = 0, 1$ . All these results can be proved similarly to the result (23) in Proposition 2 in Qiu (2009). Now, after combining (A.24), (A.25), (A.26) and

(A.27), we have the following result:

$$\widehat{f}_{LL2K,+}(x, y) = f(x, y) + O(h_n^2) + O(\rho_n^2) + O(\theta_n) + \xi_n, \quad (\text{A.28})$$

where  $\xi_n \stackrel{asy.}{\sim} N\left(0, \frac{\sum_{U_n(x,y)} \widetilde{b}_{ij}^2(x,y)}{[\sum_{\widetilde{U}_n(x,y)} \widetilde{b}_{ij}(x,y)]^2}\right)$ . Similarly, we have

$$\widehat{f}_{LL2K,-}(x, y) = f(x, y) + O(h_n^2) + O(\rho_n^2) + O(\theta_n) + \eta_n, \quad (\text{A.29})$$

where  $\eta_n \stackrel{asy.}{\sim} N\left(0, \frac{\sum_{V_n(x,y)} \widetilde{b}'_{ij}(x,y)}{[\sum_{\widetilde{V}_n(x,y)} \widetilde{b}'_{ij}(x,y)]^2}\right)$ ,  $\widetilde{b}'_{ij}(x, y)$  is defined similarly to  $\widetilde{b}_{ij}(x, y)$ . From the proof of Lemma A.2, we know that, if  $(x, y)$  is not a jump point, then

$$\theta_n = O(\rho_n^2) + O(h_n^2) + o\left(\frac{\log(n)}{nh_n^2}\right). \quad (\text{A.30})$$

Therefore, for any design point  $(x, y) \in \Omega_{h_n} \setminus S_{h_n}$ , by (A.28), (A.29) and (A.30), we have

$$\begin{aligned} \widehat{f}_{LL2K,+} - \widehat{f}_{LL2K,-} &= O(h_n^2) + O(\rho_n^2) + o\left(\frac{\log(n)}{nh_n^2}\right) \\ &+ \gamma_n \cdot \sqrt{\frac{\sum_{U_n(x,y)} \widetilde{b}_{ij}^2(x, y)}{[\sum_{\widetilde{U}_n(x,y)} \widetilde{b}_{ij}(x, y)]^2} + \frac{\sum_{V_n(x,y)} \widetilde{b}'_{ij}^2(x, y)}{[\sum_{\widetilde{V}_n(x,y)} \widetilde{b}'_{ij}(x, y)]^2}}, \end{aligned} \quad (\text{A.31})$$

where  $\gamma_n \stackrel{asy.}{\sim} N(0, 1)$ . Also, by using similar arguments to those in (A.23) and the fact that  $\widetilde{b}_{ij}(x, y) = O(n^4 h_n^8)$ , we have

$$\begin{aligned} \frac{\sum_{U_n(x,y)} w_{ij}^2(x, y)}{[\sum_{U_n(x,y)} w_{ij}(x, y)]^2} &= \frac{n^{10} h_n^{18} \frac{1}{n^{10} h_n^{18}} \sum_{U_n(x,y)} w_{ij}^2(x, y)}{\left[n^6 h_n^{10} \frac{1}{n^6 h_n^{10}} \sum_{U_n(x,y)} w_{ij}(x, y)\right]^2} \\ &= \frac{n^{10} h_n^{18} \left(\frac{1}{n^{10} h_n^{18}} \sum_{\widetilde{U}_n(x,y)} \widetilde{b}_{ij}^2(x, y) + O(\theta_n)\right)}{n^{12} h_n^{20} \left[\left(\frac{1}{n^6 h_n^{10}} \sum_{\widetilde{U}_n(x,y)} \widetilde{b}_{ij}(x, y) + O(\theta_n)\right)\right]^2} \\ &= \frac{1}{n^2 h_n^2} \frac{\frac{1}{n^{10} h_n^{18}} \sum_{\widetilde{U}_n(x,y)} \widetilde{b}_{ij}^2(x, y) + O(\theta_n)}{\left[\frac{1}{n^6 h_n^{10}} \sum_{\widetilde{U}_n(x,y)} \widetilde{b}_{ij}(x, y) + O(\theta_n)\right]^2} \\ &= \frac{1}{n^2 h_n^2} \left\{ \frac{\frac{1}{n^{10} h_n^{18}} \sum_{\widetilde{U}_n(x,y)} \widetilde{b}_{ij}^2(x, y)}{\left[\frac{1}{n^6 h_n^{10}} \sum_{\widetilde{U}_n(x,y)} \widetilde{b}_{ij}(x, y)\right]^2} + O(\theta_n) \right\}, \quad a.s. \end{aligned} \quad (\text{A.32})$$

Then, it follows that

$$\sqrt{\frac{\sum_{U_n(x,y)} w_{ij}^2(x, y)}{[\sum_{U_n(x,y)} w_{ij}(x, y)]^2} + \frac{\sum_{V_n(x,y)} w'_{ij}(x, y)}{[\sum_{V_n(x,y)} w'_{ij}(x, y)]^2}} = O\left(\frac{1}{nh_n}\right), \quad a.s. \quad (\text{A.33})$$

By (A.24), (A.25), (A.27), (A.30) and (A.33), we have

$$\begin{aligned}\frac{\text{LL2K}_n(x, y)}{Z_{1-\alpha_n}} &= O\left(\frac{nh_n\rho_n^2}{Z_{1-\alpha_n}}\right) + O\left(\frac{nh_n^3}{Z_{1-\alpha_n}}\right) + o\left(\frac{\log(n)}{h_n Z_{1-\alpha_n}}\right) + o\left(\frac{\log(n)}{Z_{1-\alpha_n}}\right) \\ &= O\left(\frac{nh_n^3}{Z_{1-\alpha_n}}\right), \text{ a.s.},\end{aligned}\tag{A.34}$$

where we have used the conditions that  $\frac{\rho_n}{h_n} = o(1)$ , and  $\frac{\log(n)}{nh_n^4} = o(1)$ . Hence, if  $\frac{nh_n^3}{Z_{1-\alpha_n}} = o(1)$ , any point  $(x, y) \in \Omega \setminus S_{h_n}$  will not be flagged as a jump candidate when  $n$  is sufficient large.

Now, let us consider a nonsingular design point  $(x, y)$  on a jump location curve that has a unique tangent line at  $(x, y)$ . As discussed in Lemma A.2, we may assume the jump location curve is the same as the tangent line in a small neighbourhood. Let  $S_{\rho_n}$  be a band of width  $2\rho_n$  that contains  $S$ . Then we have in (A.27) and (A.13)

$$\begin{aligned}& \frac{\sum_{\tilde{U}_n(x,y)} \tilde{b}_{ij}(x, y) P\{f\}(x_i, y_j)}{\sum_{\tilde{U}_n(x,y)} \tilde{b}_{ij}(x, y)} \\ &= \frac{\sum_{\tilde{U}_n(x,y) \setminus S_{\rho_n}} \tilde{b}_{ij}(x, y) P\{f\}(x_i, y_j)}{\sum_{\tilde{U}_n(x,y)} \tilde{b}_{ij}(x, y)} + \frac{\sum_{\tilde{U}_n(x,y) \cap S_{\rho_n}} \tilde{b}_{ij}(x, y) P\{f\}(x_i, y_j)}{\sum_{\tilde{U}_n(x,y)} \tilde{b}_{ij}(x, y)} \\ &= \frac{\sum_{\tilde{U}_n(x,y) \setminus S_{\rho_n}} \tilde{b}_{ij}(x, y) (f_+(x, y) + O(h_n) + O(\rho_n^2))}{\sum_{\tilde{U}_n(x,y)} \tilde{b}_{ij}(x, y)} + O\left(\frac{\rho_n}{h_n}\right) \\ &= [f_+(x, y) + O(h_n) + O(\rho_n^2)] \left(1 - O\left(\frac{\rho_n}{h_n}\right)\right) + O\left(\frac{\rho_n}{h_n}\right) \\ &= f_+(x, y) + O(h_n) + O(\rho_n/h_n),\end{aligned}$$

where  $f_+(x, y)$  denotes the limit of  $f(u, v)$  as  $(u, v)$  approaching to  $(x, y)$  from  $\tilde{U}_n(x, y)$ . In the second equation we have used the fact that the ratio of the area of  $\tilde{U}_n(x, y) \cap S_{\rho_n}$  to the area of  $\tilde{U}_n(x, y)$  is of order  $\frac{\rho_n}{h_n}$ . In the third equation, (A.8) has been used. So, we have

$$I_1(x, y) = f_+(x, y) + O(h_n^2) + O(\rho_n/h_n) + O(\theta_n).\tag{A.35}$$

By (A.25) and Lemma A.1, we have

$$I_2(x, y) = \sum_{U_n(x,y)} \frac{\tilde{b}_{ij}(x, y)}{\sum_{\tilde{U}_n(x,y)} \tilde{b}_{ij}(x, y)} \varepsilon_{ij} + O(\theta_n) = o\left(\frac{\log(n)}{nh_n}\right) + O(\theta_n) \text{ a.s.}\tag{A.36}$$

From the proof of Lemma A.2, we know that, when  $(x, y)$  is a nonsingular jump point,

$$\theta_n = O(h_n) + O(\rho_n/h_n) + o\left(\frac{\log(n)}{nh_n}\right).$$

Thus,

$$\widehat{f}_{\text{LL2K},+}(x, y) = f_+(x, y) + O(h_n) + O(\rho_n/h_n) + o\left(\frac{\log(n)}{nh_n}\right). \quad (\text{A.37})$$

Similarly, we can derive the result that

$$\widehat{f}_{\text{LL2K},-}(x, y) = f_-(x, y) + O(h_n) + O(\rho_n/h_n) + o\left(\frac{\log(n)}{nh_n}\right), \quad (\text{A.38})$$

where  $f_-(x, y)$  is defined similarly to  $f_+(x, y)$ . Then, a direct conclusion from (A.37), (A.38) and (A.33) is that

$$\begin{aligned} \frac{\text{LL2K}_n(x, y)}{Z_{1-\alpha_n}} &= O\left(\frac{nh_n(f_+(x, y) - f_-(x, y))}{Z_{1-\alpha_n}}\right) \\ &+ O(n\rho_n/Z_{1-\alpha_n}) + O\left(\frac{nh_n^2}{Z_{1-\alpha_n}}\right) + O\left(\frac{\log(n)}{h_n Z_{1-\alpha_n}}\right) \\ &= O\left(\frac{nh_n(f_+(x, y) - f_-(x, y))}{Z_{1-\alpha_n}}\right), \text{ a.s.}, \end{aligned} \quad (\text{A.39})$$

where we have used the results that  $h_n = o(1)$ ,  $\frac{\rho_n}{h_n} = o(1)$ , and  $\frac{\log(n)}{nh_n^2} = o(1)$ . Thus, in the case when  $(x, y)$  is a nonsingular jump point and the jump location curve has a unique tangent line at  $(x, y)$ , LL2K would detect  $(x, y)$  successfully when  $n$  is sufficiently large. The parallel result to (A.39) can be derived for the case when the jump location curve has two one-sided tangent lines at  $(x, y)$ . Therefore, the LL2K jump detector can detect all points in  $S \cap \Omega_{h_n} \cap \bar{J}_{S, h_n}$ . And, all points whose Euclidean distances to  $S$  are larger than  $h_n$  would not be detected. So, when  $n$  is large enough,  $S \cap \Omega_{h_n} \cap \bar{J}_{S, h_n}$  is included in  $\widehat{S}_n$ , and  $\widehat{S}_n$  is included in the band of  $S$  with width  $h_n$ . By similar arguments, it can be shown that this result also holds for the jump detectors LCK, LC2K and LLK. Thus, all results in the theorem are valid.  $\blacksquare$
